# Supplementary material for: Improved Post-Thaw Quality of Canine Semen after Treatment with Exosomes from Conditioned Medium of Adipose-Derived Mesenchymal Stem Cells
Source: PubMed Central journal article supplement (PMC6912283; doi:10.3390/ani9110865), 2019-10-25
Supplement: animals-09-00865-s001.pdf [file animals-09-00865-s001.pdf]

# Supplementary Materials: Improved Post-Thaw Quality of Canine Semen after Treatment with Exosomes from Conditioned Medium of Adipose-Derived Mesenchymal Stem Cells

Ahmad Yar Qamar <sup>1</sup>, Xun Fang <sup>1</sup>, Min Jung Kim <sup>2,\*</sup> and Jongki Cho <sup>1,\*</sup>

<sup>1</sup> College of Veterinary Medicine, Chungnam National University, Daejeon 34134, Korea; drahmadqamar@gmail.com (A.Y.Q.); fx2442@gmail.com (X.F.)

<sup>2</sup> Department of Theriogenology and Biotechnology, College of Veterinary Medicine, Seoul National University, Seoul 08826, Korea

\* Correspondence: tinia19@snu.ac.kr (M.J.K.); cjki@cnu.ac.kr (J.C.); Tel.: +82-42-821-6788 (J.C.) Fax: +82-42-821-8903 (J.C.)

**Table S1.** Motility characteristics of dog sperm cooled at 4 °C for 8–10 h.

| Groups     | Progressive motility (%)    | VCL (µm/sec)             | VSL (µm/sec) | VAP (µm/sec) | BCF (Hz)  |
|------------|-----------------------------|--------------------------|--------------|--------------|-----------|
| Control    | 40.5 ± 0.4 <sup>a,b,c</sup> | 98.5 ± 0.8 <sup>b</sup>  | 31.1 ± 0.6   | 50.9 ± 0.6   | 5.5 ± 0.2 |
| 25 µg/ mL  | 39.5 ± 0.3 <sup>b</sup>     | 96.0 ± 1.1 <sup>b</sup>  | 29.9 ± 0.6   | 49.0 ± 0.6   | 5.4 ± 0.2 |
| 50 µg/ mL  | 41.6 ± 0.7 <sup>a</sup>     | 103.1 ± 1.1 <sup>a</sup> | 31.4 ± 0.3   | 52.7 ± 0.8   | 6.1 ± 0.3 |
| 100 µg/ mL | 38.6 ± 0.4 <sup>c</sup>     | 96.8 ± 1.1 <sup>b</sup>  | 29.8 ± 0.5   | 50.2 ± 0.6   | 5.4 ± 0.6 |

Values with different superscripts letters in a column differ significantly ( $p < 0.05$ ,  $n = 4$ ). VCL, Curvilinear velocity; VSL, Straight-line velocity; VAP, Average path velocity; BCF, Beat cross frequency.

**Table S2.** Effect of exosomal treatment on the progressive motility and velocities of post-thaw dog semen.

| Group                | Progressive motility (%) | VCL (µm/sec)            | VSL (µm/sec)            | VAP (µm/sec)            | BCF (Hz)               |
|----------------------|--------------------------|-------------------------|-------------------------|-------------------------|------------------------|
| Control              | 20.9 ± 0.6 <sup>b</sup>  | 50.1 ± 0.9 <sup>b</sup> | 17.7 ± 0.7 <sup>b</sup> | 27.7 ± 0.3 <sup>b</sup> | 2.5 ± 0.0 <sup>b</sup> |
| Treatment (50 µg/mL) | 25.3 ± 0.8 <sup>a</sup>  | 62.6 ± 1.1 <sup>a</sup> | 20.6 ± 0.5 <sup>a</sup> | 32.1 ± 0.5 <sup>a</sup> | 3.2 ± 0.1 <sup>a</sup> |

Values with different superscripts letters in a column differ significantly ( $p < 0.05$ ,  $n = 4$ ). VCL, Curvilinear velocity; VSL, Straight-line velocity; VAP, Average path velocity; BCF, Beat cross frequency.
